# Supplementary material
Source: publisher site journal article supplement (https://www.dovepress.com/article/392320)
Supplement: Supplementary file 1 [file get_supplementary_file.php]

# Supplementary material

**Supplemental Table 1** Patient demographics and clinical characteristics according to currently managing physician (n=1211)

| **Characteristic** | **Hepatologist/ Gastroenterologist (n=966)** | **Diabetologist (n=245)** | ***p*-value** |
| --- | --- | --- | --- |
| Mean age, years (SD) | 55.0 (11.4) | 58.0 (9.0) | 0.0001 |
| Male sex, n | 574 (59.4) | 137 (55.9) | 0.3451 |
| Mean body mass index, kg/m2 (SD) | 32.6 (5.5) | 33.6 (8.23) | 0.0189 |
| Body mass index category, kg/m2, n (%) |  |  | 0.3759 |
| 25–30 | 231 (23.9) | 49 (20.0) |  |
| 30–35 | 461 (47.7) | 119 (48.6) |  |
| ≥35 | 274 (28.4) | 77 (31.4) |  |
| Concomitant conditions, n (%)a |  |  |  |
| Metabolicb | 626 (64.8) | 214 (87.3) | <0.0001 |
| Hypertension | 446 (46.2) | 160 (65.3) | <0.0001 |
| Dyslipidemia | 388 (40.2) | 158 (64.5) | <0.0001 |
| Mean disease duration, years (SD) | 1.5 (2.4) | 1.7 (2.6) | 0.3010 |
| Testing (ever): liver biopsy, n (%) |  |  |  |
| VCTE cohort (n=583) | 487 (53.9) | 96 (45.5) | 0.0320 |
| FIB-4 cohort (n=267) | 225 (53.2) | 42 (41.6) | 0.0458 |

aMost common conditions, occurring in >10% of patients overall.

bMetabolic=presence of any of metabolic syndrome, type 2 diabetes mellitus, insulin resistance, or hyperglycemia.

**Abbreviations:** FIB-4, Fibrosis-4 Index; SD, standard deviation; VCTE, vibration-controlled transient elastography.

**Supplemental Table 2** Patient demographics and clinical characteristics according to whether or not the patient had a liver biopsy (n=1211)

| **Characteristic** | **No Liver Biopsy (n=573)** | **Liver Biopsy (n=638)** | ***P*-Value** |
| --- | --- | --- | --- |
| Mean age, years, (SD) | 55.7 (10.8) | 55.5 (11.1) | 0.8013 |
| Male sex | 336 (47.3) | 375 (52.7) | 1.0000 |
| Mean body mass index, kg/m2, (SD) | 32.2 (5.4) | 33.3 (6.7) | 0.0029 |
| Body mass index category, kg/m2, n (%) |  |  |  |
| 25–30 | 152 (26.5) | 128 (20.1) | 0.0003 |
| 30–35 | 285 (49.7) | 295 (46.2) |  |
| ≥35 | 136 (23.7) | 215 (33.7) |  |
| Concomitant conditions, n (%)a |  |  |  |
| Metabolic | 370 (64.6) | 470 (73.7) | 0.0007 |
| Hypertension | 252 (44.0) | 354 (55.5) | 0.0001 |
| Dyslipidemia | 251 (43.8) | 295 (46.2) | 0.4182 |
| Sleep disorder | 120 (20.9) | 124 (19.4) | 0.5193 |
| Anxiety | 93 (16.2) | 108 (16.9) | 0.7576 |
| Physician specialty, n (%) |  |  | 0.0723 |
| Hepatologist | 235 (41.0) | 259 (40.6) |  |
| Gastroenterologist | 208 (36.3) | 264 (41.4) |  |
| Diabetologist | 130 (22.7) | 115 (18.0) |  |
| Disease duration, years | 1.2 (1.7) | 1.8 (2.9) | 0.0005 |

aMost common conditions, occurring in >10% of patients overall.

**Abbreviations:** FIB-4, Fibrosis-4 Index; Metabolic, presence of any of metabolic syndrome, type 2 diabetes mellitus, insulin resistance, or hyperglycemia; SD, standard deviation; VCTE, vibration-controlled transient elastography.

A


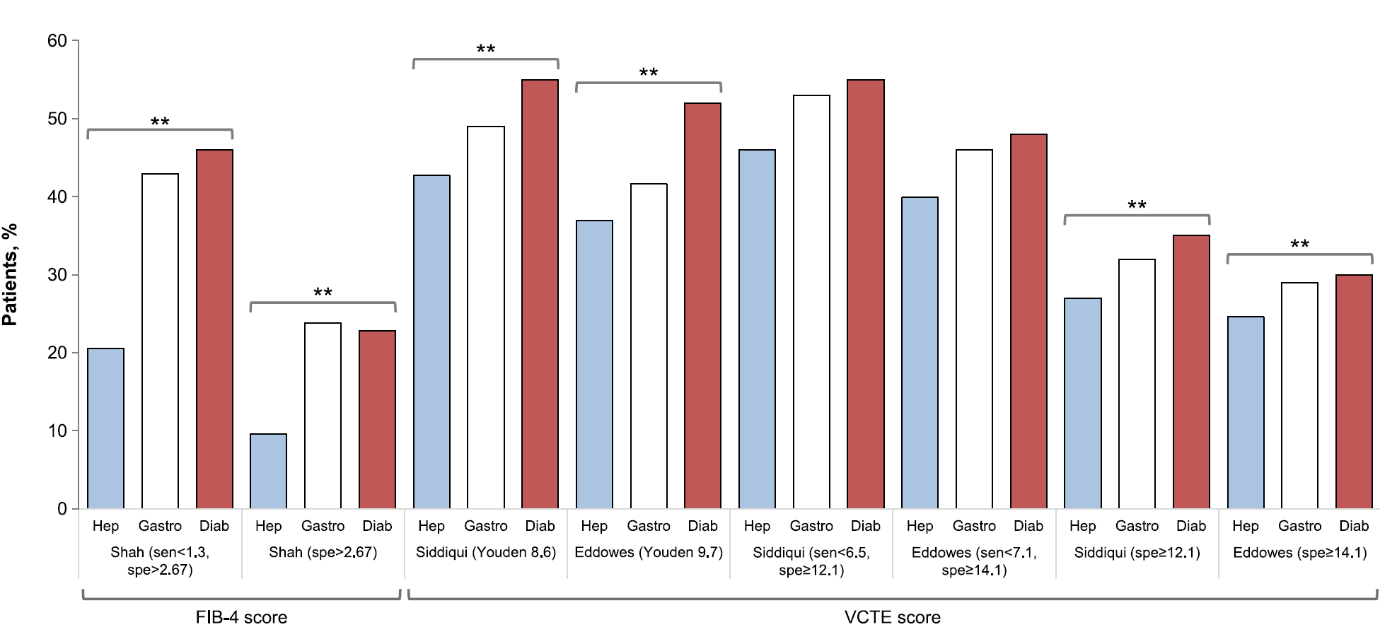


B


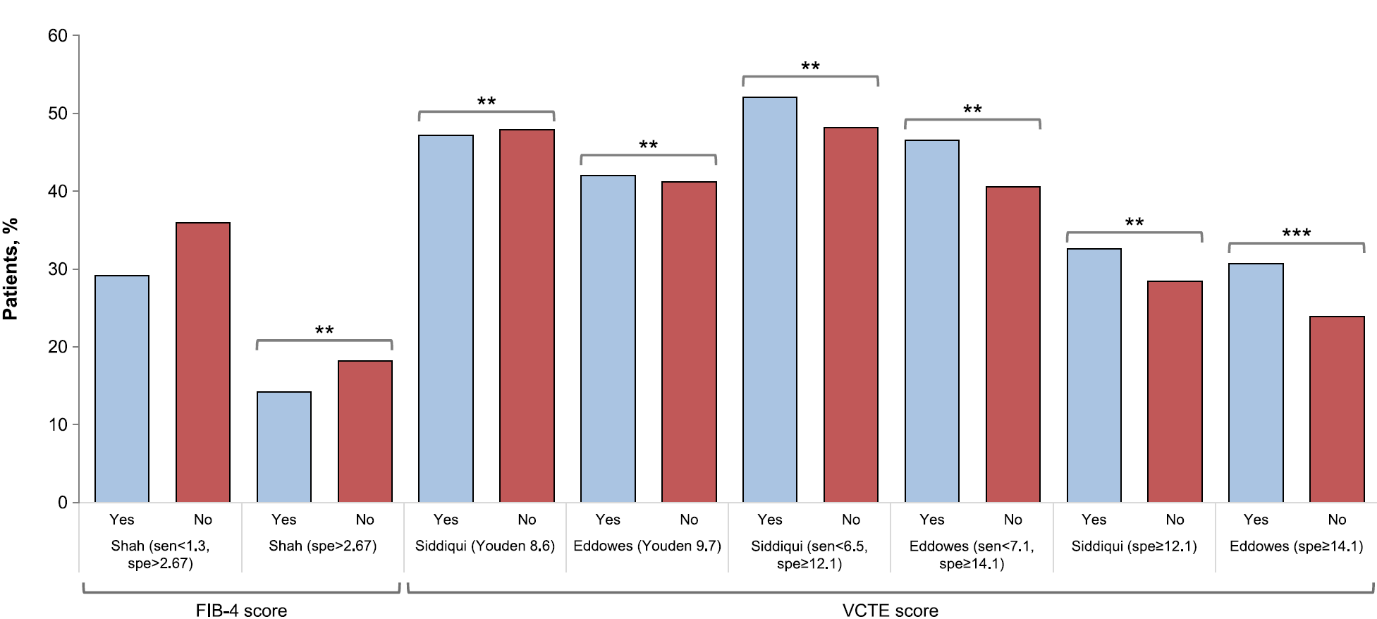


**Supplementary Figure S1** Underestimation of fibrosis using PSFS versus CRFS scores according to (A) physician specialty and (B) liver biopsy (yes vs no).

***p*<0.001; ****p*<0.0001; *p*-values apply to all four alignment groups (aligned F0–F2; aligned F3/4; physician underestimated; physician overestimated). All values in parentheses are kPa.

CRFS, clinically defined reference fibrosis score; Diab, diabetologist; FIB-4, Fibrosis-4 Index; Gastro, gastroenterologist; Hep, hepatologist; PSFS, physician-stated fibrosis score; Sen, sensitivity; Spe, specificity; VCTE, vibration-controlled transient elastography.
